# Supplementary material
Source: Springer Nature journal article supplement (https://www.springermedizin.de/resource/supplementary/12889_2011_4344_MOESM3_ESM.pdf/9491672)

# Stair climbing always burns calories.

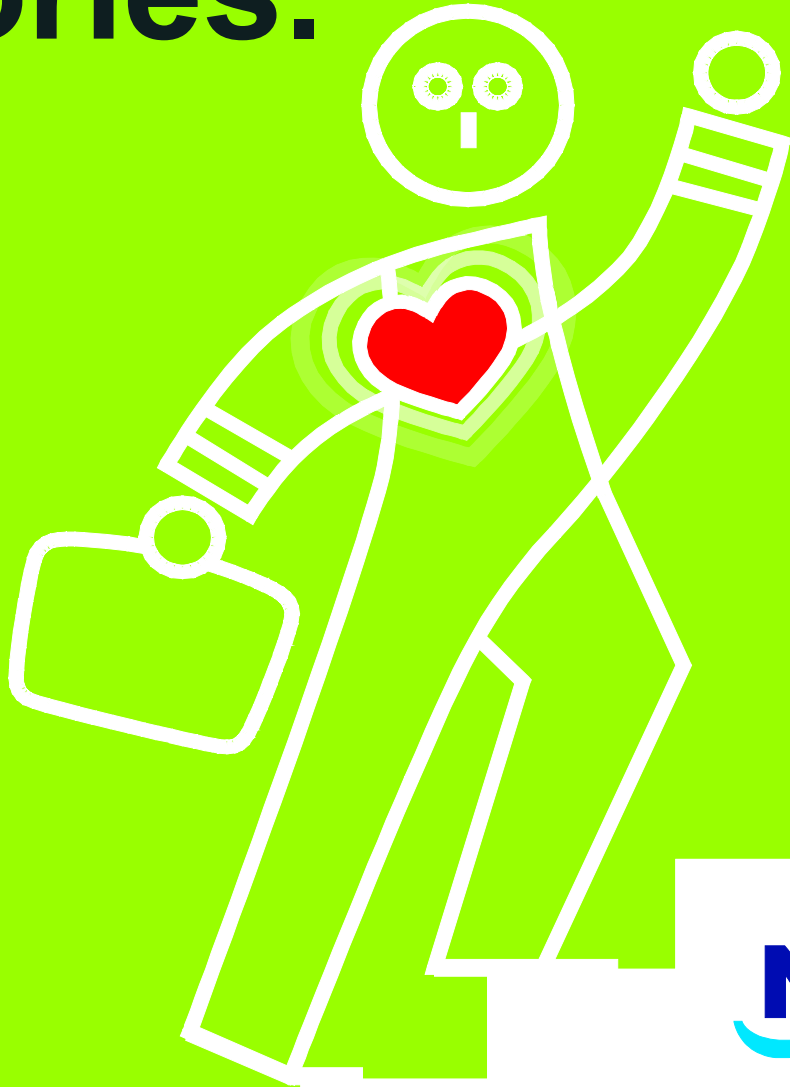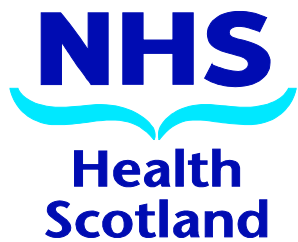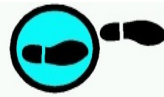

healthy**living**

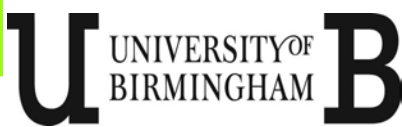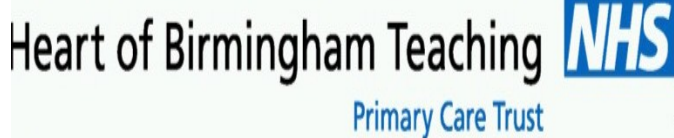

Supplement: MOESM3 [file 9491672]
